# Supplementary material
Source: Springer Nature journal article supplement (https://www.springermedizin.de/resource/supplementary/12875_2013_992_MOESM1_ESM.pdf/9435998)
Supplement: MOESM1 [file 9435998]

### Inventory for Measuring Ambiguity tolerance (IMA):

Ambiguity tolerance is the tendency to evaluate contradictions, inconsistencies, and ambiguous information in terms of their complexity and regard them in a positive manner (J. Reis). Medicine is known as "the science of unsecured, art of probability" (W. Osler); thus, personal levels of ambiguity tolerance may impact success in the medical profession.

Please provide answers to the questions below and enter your estimates in the provided spaces.

We would like to use the anonymous test results for a study dealing with ambiguity tolerance in medical students in Germany. Study participation is completely voluntary. The collected data will only be used for this purpose. Under no circumstances will the data be distributed to unauthorized third parties, and after evaluation the data will be destroyed.

How old are you? \_\_\_\_\_ years

Gender ?  male  female

In which semester (S) are you?

1./2. S  3./4. S  5./6. S  7./8. S  9./10. S  Practical Year

|                                                                                                                   | Strongly agree        | Agree                 | Partly agree          | Partly disagree       | Disagree              | Strongly disagree     |
|-------------------------------------------------------------------------------------------------------------------|-----------------------|-----------------------|-----------------------|-----------------------|-----------------------|-----------------------|
| <i>I like to plan my vacations in advance.</i>                                                                    | <input type="radio"/> | <input type="radio"/> | <input type="radio"/> | <input type="radio"/> | <input type="radio"/> | <input type="radio"/> |
| <i>Problems that appear to be insoluble feel like personal challenges to me.</i>                                  | <input type="radio"/> | <input type="radio"/> | <input type="radio"/> | <input type="radio"/> | <input type="radio"/> | <input type="radio"/> |
| <i>I enjoy going to parties where I can meet new people.</i>                                                      | <input type="radio"/> | <input type="radio"/> | <input type="radio"/> | <input type="radio"/> | <input type="radio"/> | <input type="radio"/> |
| <i>I do not like to deal with problems that appear to have no solution.</i>                                       | <input type="radio"/> | <input type="radio"/> | <input type="radio"/> | <input type="radio"/> | <input type="radio"/> | <input type="radio"/> |
| <i>Sometimes it is fun to do new things with my friends.</i>                                                      | <input type="radio"/> | <input type="radio"/> | <input type="radio"/> | <input type="radio"/> | <input type="radio"/> | <input type="radio"/> |
| <i>Unless I was receiving a lot of money, I wouldn't choose to spend my time on seemingly insoluble problems.</i> | <input type="radio"/> | <input type="radio"/> | <input type="radio"/> | <input type="radio"/> | <input type="radio"/> | <input type="radio"/> |
| <i>I try to avoid disputes.</i>                                                                                   | <input type="radio"/> | <input type="radio"/> | <input type="radio"/> | <input type="radio"/> | <input type="radio"/> | <input type="radio"/> |
| <i>I try to avoid people who like to argue.</i>                                                                   | <input type="radio"/> | <input type="radio"/> | <input type="radio"/> | <input type="radio"/> | <input type="radio"/> | <input type="radio"/> |
| <i>I need a familiar environment to feel comfortable.</i>                                                         | <input type="radio"/> | <input type="radio"/> | <input type="radio"/> | <input type="radio"/> | <input type="radio"/> | <input type="radio"/> |
| <i>I like to visit countries where I have not previously travelled.</i>                                           | <input type="radio"/> | <input type="radio"/> | <input type="radio"/> | <input type="radio"/> | <input type="radio"/> | <input type="radio"/> |
| <i>I try to avoid confrontation.</i>                                                                              | <input type="radio"/> | <input type="radio"/> | <input type="radio"/> | <input type="radio"/> | <input type="radio"/> | <input type="radio"/> |
| <i>I don't like surprises.</i>                                                                                    | <input type="radio"/> | <input type="radio"/> | <input type="radio"/> | <input type="radio"/> | <input type="radio"/> | <input type="radio"/> |
| <i>I try to avoid seemingly insoluble problems.</i>                                                               | <input type="radio"/> | <input type="radio"/> | <input type="radio"/> | <input type="radio"/> | <input type="radio"/> | <input type="radio"/> |
| <i>I try to get along with everyone.</i>                                                                          | <input type="radio"/> | <input type="radio"/> | <input type="radio"/> | <input type="radio"/> | <input type="radio"/> | <input type="radio"/> |
| <i>It is important to me that others do not think of me as belligerent.</i>                                       | <input type="radio"/> | <input type="radio"/> | <input type="radio"/> | <input type="radio"/> | <input type="radio"/> | <input type="radio"/> |
| <i>It seems pointless to me to concern myself with problems that seem insoluble.</i>                              | <input type="radio"/> | <input type="radio"/> | <input type="radio"/> | <input type="radio"/> | <input type="radio"/> | <input type="radio"/> |
| <i>I like to talk to friends about innocuous topics.</i>                                                          | <input type="radio"/> | <input type="radio"/> | <input type="radio"/> | <input type="radio"/> | <input type="radio"/> | <input type="radio"/> |
| <i>I am interested in foreign cultures.</i>                                                                       | <input type="radio"/> | <input type="radio"/> | <input type="radio"/> | <input type="radio"/> | <input type="radio"/> | <input type="radio"/> |
| <i>Dealing with seemingly insoluble problems can be useful, even if I don't solve them.</i>                       | <input type="radio"/> | <input type="radio"/> | <input type="radio"/> | <input type="radio"/> | <input type="radio"/> | <input type="radio"/> |
| <i>I am easily excited by new hobbies.</i>                                                                        | <input type="radio"/> | <input type="radio"/> | <input type="radio"/> | <input type="radio"/> | <input type="radio"/> | <input type="radio"/> |

Thank you for your participation !
